# Supplementary material for: Characterization and mechanism study of aqueous cationic polymerization of p-methylstyrene
Source: Royal Society of Chemistry journal article supplement (doi:10.1039/d1ra04334j), 2021-01-01
Supplement: d1ra04334j1.pdf [file d1ra04334j1.pdf]

Table 1 the molecular weight of the polymer test by GPC compare with the corresponding stoichiometric

| CumOH<br>Concentration (M) | Mn (g/mol) | PDI  | Mn (Theory) (g/mol) |
|----------------------------|------------|------|---------------------|
| 0.05                       | 2617       | 2.23 | 4136                |
| 0.10                       | 1902       | 2.25 | 2068                |
| 0.15                       | 1446       | 2.19 | 1379                |

The molecular weight and distribution of testing by GPC compared with theoretical value.
